# Supplementary material for: Clostridioides difficile Flagellin Activates the Intracellular NLRC4 Inflammasome
Source: MDPI journal article supplement (doi:10.3390/ijms232012366), 2022-10-15
Supplement: s1 [file s1]

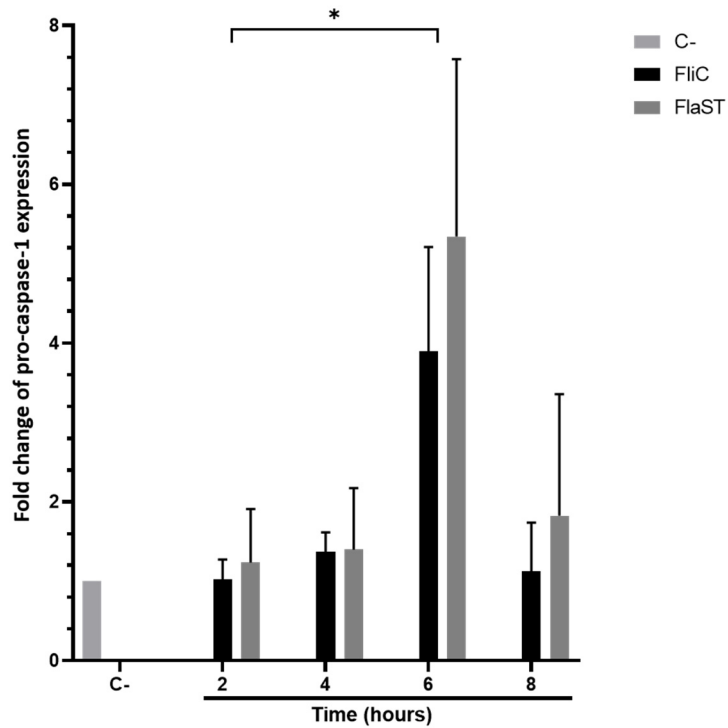

**Figure S1.** *C. difficile* flagellin induces pro-caspase-1 gene expression. Caco-2/TC7 cells treated by FliC (6  $\mu\text{g/mL}$ ), and FlaST (2  $\mu\text{g/mL}$ ) as a positive control. After 8 h, cell-free culture supernatants were collected, and pro-caspase-1 gene was quantified. Error bars indicate the standard error of the mean of three independent experiments. Results represent the mean ( $n = 3$ )  $\pm$  standard deviations for each condition. \* Statistically significant differences ( $p < 0.05$ ).

|                            |   |   |   |   |   |   |   |   |   |   |   |   |   |   |   |   |   |   |   |   |   |   |   |   |   |   |   |   |   |   |   |   |   |   |   |   |
|----------------------------|---|---|---|---|---|---|---|---|---|---|---|---|---|---|---|---|---|---|---|---|---|---|---|---|---|---|---|---|---|---|---|---|---|---|---|---|
| <i>L. pneumophila</i> *    | A | E | M | A | S | L | T | K | N | Q | I | L | Q | Q | A | G | T | A | M | L | A | Q | A | N | S | L | P | Q | S | V | L | S | L | L | G | R |
| <i>S. Typhimurium</i> *    | T | E | V | S | N | M | S | R | A | Q | I | L | Q | Q | A | G | T | S | V | L | A | Q | A | N | Q | V | P | Q | N | V | L | S | L | L | R | . |
| <i>Y. enterocolitica</i> * | T | E | V | S | N | M | S | R | A | N | I | L | Q | Q | A | G | T | S | V | L | A | Q | A | N | Q | V | P | Q | T | V | L | S | L | L | R | . |
| <i>EPEC</i> *              | T | E | V | S | N | M | S | K | A | Q | I | L | Q | Q | A | G | N | S | V | L | A | K | A | N | Q | V | P | Q | Q | V | L | S | L | L | Q | G |
| <i>EHEC</i> *              | T | E | V | S | N | M | S | K | A | Q | I | L | Q | Q | A | G | N | S | V | L | A | K | A | N | Q | V | P | Q | Q | V | L | S | L | L | Q | G |
| <i>P. luminescens</i> *    | T | E | V | S | N | M | S | R | G | Q | I | L | Q | Q | A | G | T | A | V | L | A | Q | A | N | Q | V | P | Q | N | V | M | S | L | L | R | . |
| <i>B. thailandensis</i> *  | Q | E | T | A | N | L | S | R | A | Q | V | L | Q | Q | A | G | I | S | V | L | A | Q | A | N | S | L | P | Q | Q | V | L | K | L | L | Q | . |
| <i>P. aeruginosa</i> *     | A | E | T | A | A | L | S | K | N | Q | V | L | Q | Q | A | G | T | A | I | L | A | Q | A | N | Q | L | P | Q | A | V | L | S | L | L | R | . |
| <i>C. difficile</i> **     | E | M | V | A | N | L | S | K | M | N | I | L | V | Q | A | S | Q | S | M | L | A | Q | A | N | Q | Q | P | Q | G | V | L | Q | L | L | G | . |
|                            |   |   |   |   |   |   |   |   |   |   |   |   |   | * | * | * | * | * |   |   |   |   |   |   |   |   | * | * | * | * | * | * | * | * | * | * |

**Figure S2.** Flagellins interact with inflammasomes via a conserved region: Sequence alignment of the C-terminal sides of different bacterial flagellins. Flagellin residues interacting with NAIP5 are indicated with asterisks. Conserved residues are in red. Amino acids localizations are 461-495 (\*) or 241-290 (\*\*). According to Yang et al. [36].
